# Supplementary material
Source: PubMed Central journal article supplement (PMC2820103)
Supplement: NIHMS174304-supplement-1_si_001.pdf [file NIHMS174304-supplement-1_si_001.pdf]

## **SUPPORTING MATERIAL FOR**

### **The Subunit Structure of Benzylsuccinate Synthase<sup>†</sup>**

Lei Li<sup>#</sup>, Dustin P. Patterson<sup>#</sup>, Christel C. Fox<sup>#</sup>, Brian Lin<sup>#</sup>, Peter W.

Coschigano<sup>§</sup> and E. Neil G. Marsh<sup>#\*</sup>

<sup>#</sup>Department of Chemistry, University of Michigan, Ann Arbor, MI 48109-1055, USA

and <sup>§</sup>Department of Biomedical Sciences Ohio University, Athens OH 45701-2979, USA

## Construction of expression plasmids used in this study.

### *Materials.*

DNA-modifying enzymes and reagents were purchased from New England Biolabs (Beverly, MA). Oligonucleotide primers were obtained either from IDT Integrated DNA Technologies (Coralville, IA) or from Invitrogen (Carlsbad, CA). *E. coli* BL21( $\lambda$ DE3) and expression vectors pET-28b, pACYC-Duet, pET-Duet, pRSF-Duet were purchased from Novagen (Madison, WI); Pfu turbo DNA polymerase and *E. coli* XL1-Blue were from Stratagene (Cedar Creek, TX)..

### *Subcloning of tut genes from PWC-301*

The genes were subcloned from PWC-301, a pBluescript plasmid carrying a cosmid clone which contains the *tutE* gene and the *tutFDGH* that has been described previously (1). The *tutFDGH* gene cluster was amplified using by polymerase chain reaction (PCR) technology. The forward primer (5'-GAG ACC CAT ATG AAC GAC ATC GTA AGC-3') included an *NdeI* restriction site (underlined) flanked by a 6 bp GAG ACC clamp. The reverse primer (5'-GAA GCT TGG CGG CGA TGT ATT GGA CG-3') contained a *HindIII* restriction site (underlined) flanked by a 1 bp G clamp. The PCR was performed with a Biometra (Horsham, PA) TRIO-thermoblock according to a procedure recommended by the manufacture. The product was directly ligated into the PCR-BluntII-TOPO vector (Invitrogen<sup>TM</sup>) by following the given protocol. The resultant vector was designated pTopoTutD.

The Plasmid pTopoTutD was digested with *NdeI/HindIII* and the *tutFDGH* gene cluster was ligated into pET 28b vector previously digested with the same enzymes and the resultant vector is named pET 28\_FDGH.

### *Construction of tutF expression vector*

To insert *tutF* into the pET 28 vector, a forward primer (5'-GGA GAC TCA CAT ATG GGA ACC ACC ACA TGC AAG CAG-3') and a reverse primer (5'-CTG CTT GCA TGT GGT GGT TCC CAT ATG TGA GTC TCC-3') were used to introduce an *NdeI* restriction site (underlined) at the start codon of the *tutF* gene in pET 28\_FDGH through a typical QuikChange II PCR procedure. The resulting plasmid was digested with *NdeI/EcoRI* and the restriction fragment isolated by gel electrophoresis and ligated into pET 28 vector digested with the same enzymes. The resultant vector was named pET 28\_F.

### *Construction of tutG expression vector*

With primers (5'-CGG TTG CAC GAA AAC ATA TGG AGG GCA GCA ACA TGG -3') and (5'-CCA TGT TGC TGC CCT CCA TAT GTT TTC GTG CAA CCG-3'), an *NdeI* restriction site (underlined) was introduced at the start codon of the *tutG* gene in pET 28\_FDGH using a typical QuikChange II PCR procedure. The resulting plasmid was digested with *NdeI/HindIII* and the restriction fragment isolated by gel electrophoresis and ligated into pET 28 vector digested with the same enzymes. The resultant vector was named pET 28\_G (which contains both *tutG* and *tutH* genes; the later is not expressed).

### *Construction of tutD expression vector*

An *NdeI* restriction site (underlined) was introduced at the start codon of the *tutD* gene in pET 28\_FDGH using a typical QuikChange II PCR procedure with primers (5'-AAA CTA CAG ATC AAG GAG ACC CAT ATG AAC GAC ATC GTA AGC GCC-3') and (5'-GGC GCT TAC GAT GTC GTT CAT ATG GGT CTC CTT GAT CTG TAG TTT-3'). The resultant plasmid was digested with *NdeI/HindIII* and the restriction fragment isolated by gel electrophoresis and ligated into the pET 28 vector digested with the same enzymes. The resultant plasmid was named pET 28\_D (which contains *tutD*, *tutG* and *tutH*).

#### *Construction of the TutF\_TutD co-expression vector*

The *tutF* gene was amplified from the pET 28\_F plasmid described above using PCR. The forward amplification primer (5'-ATC CAT GGG AAC CAC CAC ATG CAA GCA G-3') included an *NcoI* restriction site (underlined) flanked by a 2 bp AT clamp and the first 21 bases of the *tutF* gene. The reverse primer (5'-TT AAG CTT TTA GCG CTT CGT TTG AAA GGC TTC-3') contained a *HindIII* restriction site (underlined) flanked by a 2 bp TT clamp and the last 24 bases of the *tutF* gene, including the stop codon. The PCR product was isolated and digested with *NcoI* and *HindIII* and ligated into multiple-cloning site I of a similarly digested pET-Duet vector by standard procedures. The resultant vector was designated pET-Duet\_F.

The *tutD* gene was amplified from the pET 28\_D vector. The forward amplification primer (5'-AAT TAA CAT ATG AAC GAC ATC GTA AGC GCC AAG-3') included an *NdeI* restriction site (underlined) flanked by a 6 bp AAT TAA clamp and the first 21 bases of the *tutD* gene. The reverse primer (5'-TT GGT ACC TTA GAT TTC GAC GTT TAG GAA CTC-3') contained a *KpnI* restriction site (underlined) flanked by a 2 bp TT clamp and the last 24 bases of the *tutD* gene, including the stop codon. The PCR product was digested with *NdeI* and *KpnI* and ligated into the multiple-cloning site II of a similarly digested pET\_F vector. The resultant vector is called pET\_D\_F\_1.

#### *Construction of a His<sub>6</sub>-tag at the 3'-terminus of tutD*

To add a His-Tag encoding sequence at the 3'-terminus of *tutD*, an *XbaI* restriction site on the pET\_D\_F\_1 vector was mutated away (underlined) using primers (5'-GGG GAA TTG TGA GCG GAT AAC AAT TCC CCT TTA GAA ATA ATT TTG-3') and (5'-CAA AAT TAT TTC TAA AGG GGA ATT GTT ATC CGC TCA CAA TTC CCC-3') by PCR. These primers were added to a typical QuikChange II reaction mixture together with the pET\_D\_F\_1 vector as template and the PCR reaction was performed following the procedure recommended by the manufacturer. The resultant vector was called pET\_D\_F\_2.

Next, a new *XbaI* restriction site (underlined) was introduced into the pET\_D\_F\_2 vector immediately after the S-tag-encoding sequence using primers (5'-GCC AGC ACA TGG ACT CGT CTA GAA GCG CAG CTT A-3') and (5'-TAA GCT GCG CTT CTA GAC GAG TCC ATG TGC TGG C-3') under the same PCR procedure described above. The resultant construct was named pET\_D\_F\_3.

To introduce the 6-His-tag and following stop codon into pET\_D\_F\_3, two short oligonucleotides (5'-CGG ATC CGG CAG CAG CCA TCA CCA TCA TCA CCA CTA AT-3') and (5'-CTA GAT TAG TGG TGA TGA TGG TGA TGG CTG CTG CCG GAT CCG GTA C-3') including sequence coding for 6 His (underlined) and a TAA stop codon

(Shown in bold) were used. They had 38 bases complementary to each other as well as flanked bases corresponding to the overhangs after *KpnI* and *XbaI* digestion. These oligos were treated with T4 polynucleotide kinase (NEB, Beverly, MA) to phosphorylate the 5' termini, allowed to anneal by heating to 95 °C followed by slowly cooling to ambient temperature, and ligated into the pET\_D\_F\_3 vector digested previously with *KpnI* and *XbaI* and purified by a QIAquick PCR purification Kit from Qiagen. The resulting construct was named pET\_D\_F\_4.

Finally, the original stop codon in the *tutD* gene was mutated to TCA (underlined) by PCR using primers (5'-CCT AAA CGT CGA AAT CTC AGG TAC CGG ATC CGG CAG C-3') and (5'-GCT GCC GGA TCC GGT ACC TGA GAT TTC GAC GTT TAG G-3') and vector pET\_D\_F\_4 as template. The resultant construct was designated pET-Duet\_D\_F, in which *tutD* contains a sequence encoding a C-terminus His<sub>6</sub> tag to facilitate protein purification through Ni-NTA affinity column.

#### *Construction of the tutG co-expression vector*

The *tutG* gene was amplified from the pET 28\_G vector. The forward amplification primer (5'-AAT TAA CAT ATG GAG GGC AGC AAC ATG GAA ACA-3') included an *NdeI* restriction site (underlined) flanked by a 6 bp AAT TAA clamp and the first 21 bases of the *tutG* gene. The reverse primer (5'-ATT CTC GAG TCA GAC GTG GTC GCG GAA ACT -3') contained an *XhoI* restriction site (underlined) flanked by a 3 bp ATT clamp and the last 21 bases of the *TutG* gene, including the stop codon. The PCR product for *tutG* was isolated and digested with *NdeHI* and *XhoI* and ligated into multiple-cloning site II of a similarly digested expression vector pRSF-Duet by standard procedures. The resultant vector was called pRSF-Duet\_G.

#### *Construction of the tutF\_tutD co-expression vector with an early stop codon inserted into the tutF gene*

To make a construct with only *tutD* gene expressed, an early stop codon was inserted into the *tutF* gene to yield a prematurely terminated *tutF* gene with only the first 16 amino acid expressed. The forward primer (5' - AAA CTT CTT TCC CGT CCA CTA AAG ACG CGG ATG AC - 3') contained an extra A (underlined) so that a new TAA stop codon (shown in bold type) was generated right after this insertion. The reverse primer (5' - GTC ATC CGC GTC TTT AGT GGA CGG GAA AGA AGT TT - 3') contained 34 bases and was complementary to the forward primer. These primers were added to a typical QuikChange II reaction mixture together with the pET\_D\_F vector as template and the PCR reaction was performed accordingly. The resulting plasmid was designated pET-Duet\_D\_F\_stop.

#### *Construction of the tutF C9S mutant\_tutD co-expression vector*

The *tutF* C9S mutant was conducted with a forward primer (5'-ACC ACC ACA TGC AAG CAG TCG GCA AAC TTC TTT CCC-3') and a reverse primer (5'-GGG AAA GAA GTT TGC CGA CTG CTT GCA TGT GGT GGT-3'). The primers were added to a typical QuikChange II reaction mixture together with the pET-Duet\_D\_F vector as template and the PCR reaction was performed accordingly. The resulting plasmid was designated pET-Duet\_D\_F\_C9S.

*Construction of the tutG C29S mutant co-expression vector*

This *tutG* C29S mutant was constructed with a forward primer (5'-GCC GTG CCG GAG TTC GAA ATG GCA AAC CCC-3') and a reverse primer (5'-GGG GTT TGC CAT TTC GAA CTC CGG CAC GGC-3'). The primers were added to a typical QuikChange II reaction mixture together with the pRSF-Duet\_G plasmid as template and the PCR reaction was performed accordingly. The resulting plasmid was designated pRSF-Duet\_G\_C29S.

*Construction of the His-tagged tutF C9S mutant in pACYC-Duet vector*

The *tutF* C9S gene was amplified by PCR using the pET-Duet\_D\_F\_C9S vector as template. The forward amplification primer (5'-AAG CTT GGA TCC TGG AAC CAC CAC ATG CAA GCA GTC G-3') included a *Bam*HI restriction site (underlined) flanked by a 6 bp AAG CTT clamp and the first 24 bases of the *TutF* C9S gene. In addition, a single T was inserted right after the *Bam*HI cutting site to keep the gene in the correct reading frame. The reverse primer (5'-GAA TTC CTC GAG TTA GCG CTT CGT TTG AAA GGC TTC-3') contained a *Xho*I restriction site (underlined) flanked by a 6 bp GAA TTC clamp and the last 24 bases of the *tutF* gene, including the stop codon. The PCR product was isolated and digested with *Bam*HI and *Xho*I and ligated into the multiple-cloning site I of a similarly digested expression vector pACYC-Duet by standard procedures. The resultant vector is called pACYC\_F\_C9S which contains a His<sub>6</sub>-tag at the N-terminus.

*Construction of the His-tagged tutG C29S mutant in pET 28 vector*

This *tutG* C29S mutant was constructed with same primers used in pRSF-Duet\_G\_C29S preparation and a similar PCR procedure except using pET\_28\_G as template. The resulting plasmid was designated pET28\_G\_C29S which contains a His<sub>6</sub>-tag at the N-terminus.

**Reference:**

- (1) P.W. Coschigano, Transcriptional analysis of the *tutE* *tutFDGH* gene cluster from *Thaueria aromatica* strain T1, Applied and Environmental Microbiology 66 (2000) 1147-1151.
